# Supplementary material for: Clinical features in coronavirus disease 2019 (COVID-19) patients with early clearance and prolonged shedding of severe acute respiratory syndrome coronavirus 2 (SARS-CoV-2) RNA
Source: PubMed Central journal article supplement — Ann Transl Med. 2021 Apr;9(8):665. doi: 10.21037/atm-21-445 (PMC8106067; doi:10.21037/atm-21-445), 2021-04
Supplement: atm-09-08-665-supplementary.pdf [file atm-09-08-665-supplementary.pdf]

**Table S1** Demographics and baseline characteristics of patients with early (<23 days) and late (≥23 days) viral RNA clearance

| Characteristic                                    | Total (N=652)         | All patients        |                      | Moderate            |                                | Severe                |                                  | Critical          |                            |
|---------------------------------------------------|-----------------------|---------------------|----------------------|---------------------|--------------------------------|-----------------------|----------------------------------|-------------------|----------------------------|
|                                                   |                       | EC (N=312)          | LC (N=340)           | EC (N=212)          | LC (N=226)                     | EC (N=84)             | LC (N=91)                        | EC (N=16)         | LC (N=23)                  |
| DFSO to diagnosis confirmed [IQR]                 | 9 [12]                | 6 [6]               | 15.5 [13]*           | 6 [5]               | 15 [14]**                      | 8 [7]                 | 16 [10] <sup>ss</sup>            | 5.5 [8.5]         | 14 [16] <sup>§</sup>       |
| DFSO to admission [IQR]                           | 5 [8]                 | 4 [5]               | 6.5 [11]*            | 4 [5]               | 6 [11.25]**                    | 4 [8]                 | 7 [10]                           | 2 [3.75]          | 8 [12] <sup>§</sup>        |
| Median persistence time [IQR]                     | 13 [15]               | 7 [7]               | 21 [14.5]*           | 7 [7]               | 24 [13]**                      | 9 [7]                 | 20 [15] <sup>ss</sup>            | 8 [9]             | 21 [21] <sup>§§</sup>      |
| Days to achieve the first negative test [IQR]     | 23 [18]               | 15 [8]              | 32 [14]*             | 15 [8]              | 33 [14]**                      | 16 [6.75]             | 31 [14] <sup>ss</sup>            | 15.5 [5.5]        | 32 [16] <sup>§§</sup>      |
| Days to achieve the second negative test [IQR]    | 29 [18]               | 20 [7.5]            | 37 [13]*             | 19 [9]              | 37 [14]**                      | 21 [9]                | 37 [12.5]                        | 19 [9]            | 40 [15]                    |
| Age, years [IQR]                                  | 58 [19]               | 61 [21]             | 57 [18]              | 57 [22]             | 55 [18.25]                     | 65 [21.75]            | 59 [19] <sup>§</sup>             | 62.5 [21.75]      | 70 [18]                    |
| Female, no. (%)                                   | 340/652 (52.1)        | 156/312 (50.0)      | 184/340 (54.1)       | 104/212 (49.1)      | 126/226 (55.8)                 | 47/84 (56.0)          | 49/91 (53.8)                     | 5/16 (31.3)       | 9/23 (39.1)                |
| Weight, kg [IQR]                                  | 65 [13], (N=367)      | 65 [15], (N=170)    | 67.5 [15]*, (N=197)  | 65 [14.25], [N=118] | 68 [15] <sup>§</sup> , [N=134] | 63.75 [15.25], [N=46] | 65 [12], [N=57]                  | 65.5 [13], [N=6]  | 65 [23], [N=6]             |
| Height, cm [IQR]                                  | 168.0 [15.25], (N=46) | 167.0 [20], (N=15)  | 168.0 [15.0], (N=31) | /                   | /                              | /                     | /                                | /                 | /                          |
| Symptoms, no./total no. (%)                       |                       |                     |                      |                     |                                |                       |                                  |                   |                            |
| Fever                                             | 448/652 (68.7)        | 193/312 (61.9)      | 255/240 (75.0)**     | 121/212 (57.1)      | 172/226 (76.1)**               | 64/84 (76.2)          | 64/91 (70.3)                     | 9/16 (56.3)       | 18/23 (78.3) <sup>§</sup>  |
| Shivering                                         | 122/652 (18.7)        | 52/312 (16.7)       | 70/340 (20.6)        | 28/212 (13.2)       | 49/226 (21.7) <sup>§</sup>     | 22/84 (26.2)          | 19/91 (20.9)                     | 2/16 (12.5)       | 2/23 (8.7)                 |
| Dry cough                                         | 446/652 (68.4)        | 199/312 (63.8)      | 247/340 (72.6)*      | 130/212 (61.3)      | 163/226 (72.1) <sup>§</sup>    | 59/84 (70.2)          | 69/91 (75.8)                     | 11/16 (68.8)      | 14/23 (60.9)               |
| Sputum production                                 | 51/652 (7.8)          | 16/312 (5.1)        | 35/340 (10.3)*       | 12/212 (5.7)        | 24/226 (10.6)                  | 3/84 (3.6)            | 10/91 (11.0) <sup>§</sup>        | 1/16 (6.3)        | 1/23 (4.3)                 |
| Breathlessness                                    | 246/652 (37.7)        | 118/312 (37.8)      | 128/340 (37.6)       | 59/212 (27.8)       | 61/226 (27.0)                  | 50/84 (59.5)          | 54/91 (59.3)                     | 8/16 (50.0)       | 14/23 (60.9)               |
| Sore throat                                       | 51/652 (7.8)          | 18/312 (5.8)        | 33/340 (9.7)         | 15/212 (7.1)        | 23/226 (10.2)                  | 3/84 (3.6)            | 10/91 (11.0) <sup>§</sup>        | 0/16 (0)          | 0/23 (0)                   |
| Thoracic tightness or pain                        | 72/652 (11.0)         | 29/312 (9.3)        | 43/340 (12.6)        | 18/212 (8.5)        | 24/226 (10.6)                  | 8/84 (9.5)            | 16/91 (17.6) <sup>§</sup>        | 3/16 (18.8)       | 3/23 (13.0)                |
| Myalgia                                           | 123/652 (18.9)        | 54/312 (17.3)       | 69/340 (20.3)        | 33/212 (15.6)       | 47/226 (20.8)                  | 21/84 (25.0)          | 20/91 (22.0)                     | 0/16 (0)          | 2/23 (8.7) <sup>§</sup>    |
| Headache                                          | 29/652 (4.4)          | 11/312 (3.5)        | 18/340 (5.3)         | 8/212 (3.8)         | 11/226 (4.9)                   | 2/84 (2.4)            | 6/91 (6.6) <sup>§</sup>          | 1/16 (6.3)        | 1/23 (4.3)                 |
| Fatigue                                           | 273/652 (41.9)        | 138/312 (44.2)      | 135/340 (39.7)       | 83/212 (39.2)       | 85/226 (37.6)                  | 51/84 (60.7)          | 38/91 (41.8) <sup>ss</sup>       | 5/16 (31.3)       | 11/23 (47.8) <sup>§</sup>  |
| Anorexia                                          | 91/652 (14.0)         | 38/312 (12.2)       | 53/340 (15.6)        | 18/212 (8.5)        | 30/226 (13.3)                  | 19/84 (22.6)          | 22/91 (24.2)                     | 1/16 (6.3)        | 1/23 (4.3)                 |
| Diarrhea                                          | 47/652 (7.2)          | 24/312 (7.7)        | 23/340 (6.8)         | 15/212 (7.1)        | 15/226 (6.6)                   | 8/84 (9.5)            | 8/91 (8.8)                       | 1/16 (6.3)        | 0/23 (0) <sup>§</sup>      |
| Nausea                                            | 25/652 (3.8)          | 12/312 (3.8)        | 13/340 (3.8)         | 7/212 (3.3)         | 6/226 (2.7)                    | 4/84 (4.8)            | 7/91 (7.7)                       | 1/16 (6.3)        | 0/23 (0) <sup>§</sup>      |
| Consciousness disorder                            | 6/652 (0.9)           | 2/312 (0.6)         | 4/340 (1.2)          | 2/212 (0.9)         | 0/226 (0)                      | 0/84 (0)              | 3/91 (3.3) <sup>§</sup>          | 0/16 (0)          | 1/23 (4.3)                 |
| Comorbidities, no./total no. (%)                  |                       |                     |                      |                     |                                |                       |                                  |                   |                            |
| Chronic lung disease                              | 29/652 (4.4)          | 13/312 (4.2)        | 16/340 (4.7)         | 7/212 (3.3)         | 8/226 (3.5)                    | 4/84 (4.8)            | 6/91 (6.6)                       | 2/16 (12.5)       | 2/23 (8.7)                 |
| Hypertension                                      | 230/652 (35.3)        | 92/312 (29.5)       | 138/340 (40.6)*      | 49/212 (23.1)       | 78/226 (34.4) <sup>§</sup>     | 32/84 (38.1)          | 48/91 (68.8) <sup>ss</sup>       | 11/16 (68.8)      | 12/23 (52.2) <sup>§</sup>  |
| Diabetes                                          | 99/652 (15.2)         | 41/312 (13.1)       | 58/340 (17.1)        | 21/212 (9.9)        | 32/226 (14.2)                  | 16/84 (19.0)          | 21/91 (23.1)                     | 4/16 (25.0)       | 5/23 (21.7)                |
| Cardiovascular disease                            | 63/652 (9.7)          | 25/312 (8.0)        | 38/340 (11.2)        | 7/212 (3.3)         | 14/226 (6.2)                   | 12/84 (14.3)          | 18/91 (19.8)                     | 6/16 (37.5)       | 6/23 (26.1)                |
| Chronic kidney disease                            | 40/652 (6.1)          | 7/312 (2.2)         | 33/340 (9.7)**       | 4/212 (1.9)         | 11/226 (4.9)                   | 2/84 (2.4)            | 17/91 (18.7) <sup>ss</sup>       | 1/16 (6.3)        | 5/23 (21.7) <sup>§</sup>   |
| Uremia                                            | 18/652 (2.8)          | 2/312 (0.6)         | 16/340 (4.7)*        | 0/212 (0)           | 3/226 (1.3)                    | 1/84 (1.2)            | 10/91 (11.0) <sup>ss</sup>       | 1/16 (6.3)        | 3/23 (13.0)                |
| Chronic liver disease                             | 34/652 (5.2)          | 9/312 (2.9)         | 25/340 (7.4)*        | 6/212 (2.8)         | 12/226 (5.3)                   | 2/84 (2.4)            | 9/91 (9.9) <sup>ss</sup>         | 1/16 (6.3)        | 4/23 (17.4) <sup>§</sup>   |
| Anemia                                            | 50/652 (7.7)          | 6/312 (1.9)         | 44/340 (12.9)**      | 2/212 (0.9)         | 17/226 (7.5) <sup>§</sup>      | 3/84 (3.6)            | 17/91 (18.7) <sup>ss</sup>       | 1/16 (6.3)        | 10/23 (43.5) <sup>§§</sup> |
| Hyperlipidemia                                    | 26/652 (4.0)          | 6/312 (1.9)         | 20/340 (5.9)*        | 3/212 (1.4)         | 10/226 (4.4)                   | 1/84 (1.2)            | 10/91 (11.0) <sup>ss</sup>       | 1/16 (6.3)        | 1/23 (4.3)                 |
| Cerebrovascular disease                           | 20/652 (3.1)          | 12/312 (3.8)        | 8/340 (2.4)          | 6/212 (2.8)         | 1/226 (0.4)                    | 3/84 (3.6)            | 3/91 (3.3)                       | 3/16 (18.8)       | 4/23 (17.4)                |
| Immunosuppression                                 | 8/652 (1.2)           | 3/312 (1.0)         | 5/340 (1.5)          | 1/212 (0.5)         | 0/226 (0)                      | 1/84 (1.2)            | 4/91 (4.4) <sup>§</sup>          | 1/16 (6.3)        | 1/23 (4.3)                 |
| Cancer                                            | 9/652 (1.4)           | 7/312 (2.2)         | 2/340 (0.6)          | 6/212 (2.8)         | 0/226 (0) <sup>§</sup>         | 1/84 (1.2)            | 1/91 (1.1)                       | 0/16 (0)          | 1/23 (1.4)                 |
| Medications, no./total no. (%)                    |                       |                     |                      |                     |                                |                       |                                  |                   |                            |
| ACE inhibitor or ARB                              | 31/652 (4.8)          | 9/312 (2.9)         | 22/340 (6.5)*        | 6/212 (2.8)         | 11/226 (4.9)                   | 1/84 (1.2)            | 11/91 (12.1) <sup>ss</sup>       | 2/16 (12.5)       | 0/23 (0) <sup>§§</sup>     |
| Systemic steroid                                  | 42/652 (6.4)          | 22/312 (7.1)        | 21/340 (6.2)         | 7/212 (3.3)         | 6/226 (2.7)                    | 8/84 (9.5)            | 8/91 (8.8)                       | 7/16 (43.8)       | 7/23 (30.4)                |
| Administration of antivirals                      | 393/652 (60.3)        | 211/312 (67.6)      | 182/340 (53.5)**     | 131/212 (61.8)      | 125/226 (55.3)                 | 70/84 (83.3)          | 52/91 (57.1) <sup>ss</sup>       | 9/16 (56.3)       | 6/23 (26.1) <sup>§§</sup>  |
| Chloroquine                                       | 49/652 (7.5)          | 33/312 (10.6)       | 16/340 (4.7)*        | 22/212 (10.4)       | 9/226 (4.0) <sup>§</sup>       | 10/84 (11.9)          | 7/91 (7.7)                       | 1/16 (6.3)        | 0/23 (0) <sup>§</sup>      |
| Lopinavir and ritonavir                           | 11/652 (1.7)          | 4/312 (1.3)         | 7/340 (2.1)          | 3/212 (1.4)         | 6/226 (2.7)                    | 1/84 (1.2)            | 1/91 (1.1)                       | 0/16 (0)          | 0/23 (0)                   |
| Arbidol                                           | 383/652 (58.7)        | 207/312 (66.3)      | 176/340 (51.8)*      | 130/212 (61.3)      | 122/226 (54)                   | 69/84 (82.1)          | 45/91 (49.5) <sup>ss</sup>       | 7/16 (43.8)       | 10/23 (43.5)               |
| Ribavirin                                         | 62/652 (9.5)          | 35/312 (11.2)       | 27/340 (7.9)         | 18/212 (8.5)        | 9/226 (4.0)                    | 11/84 (13.1)          | 12/91 (13.2)                     | 6/16 (37.5)       | 6/23 (26.1)                |
| Interferon                                        | 56/652 (8.6)          | 25/312 (8.0)        | 31/340 (9.1)         | 13/212 (6.1)        | 21/226 (9.3)                   | 10/84 (11.9)          | 9/91 (9.9)                       | 1/16 (6.3)        | 2/23 (8.7)                 |
| Administration of antibiotics - no./total no. (%) | 313/652 (48.0)        | 166/312 (53.2)      | 147/340 (43.2)       | 97/212 (45.8)       | 77/226 (34.1) <sup>§</sup>     | 55/84 (65.5)          | 48/91 (52.7) <sup>§</sup>        | 14/16 (87.5)      | 22/23 (95.7)               |
| Laboratory tests, median (IQR)                    |                       |                     |                      |                     |                                |                       |                                  |                   |                            |
| Neutrophils, ×10 <sup>9</sup> /L                  | 3.385 (1.74), N=636   | 3.54 (1.87), N=303  | 3.28 (1.66), N=333   | 3.345 (1.62), N=206 | 3.2 (1.45), N=220              | 3.805 (1.81), N=82    | 3.25 (1.74), N=90                | 4.65 (2.56), N=15 | 5.93 (5.96), N=23          |
| Lymphocytes, ×10 <sup>9</sup> /L                  | 1.54 (0.78), N=638    | 1.51 (0.75), N=304  | 1.5686 (0.79), N=334 | 1.58 (0.73), N=207  | 1.66 (0.71), N=221             | 1.355 (0.83), N=82    | 1.535 (0.90), N=90               | 0.90 (0.72), N=15 | 0.75 (0.51), N=23          |
| Eosinophils, ×10 <sup>9</sup> /L                  | 0.11 (0.12), N=640    | 0.09 (0.11), N=305  | 0.12 (0.14)**, N=335 | 0.1 (0.12), N=207   | 0.13 (0.15)**, N=221           | 0.08 (0.1), N=83      | 0.11 (0.12) <sup>ss</sup> , N=91 | 0.04 (0.14), N=15 | 0.02 (0.12), N=23          |
| Hemoglobin, g/L                                   | 124 (22.25), N=638    | 125.5 (22.0), N=304 | 124.0 (23.5)*, N=334 | 128 (20.75), N=206  | 126 (23.0), N=221              | 121 (21.5), N=82      | 120 (29.25), N=90                | 126 (36.5), N=16  | 93 (40.0), N=23            |
| Alanine aminotransferase, U/L                     | 24 (23.0), N=632      | 23.0 (22.0), N=294  | 25.0 (25) N=338      | 23 (22.5), N=197    | 24.5 (25.0), N=224             | 26 (22.0), N=81       | 25 (20.0), N=91                  | 24 (20.25), N=16  | 24 (79.0), N=23            |
| Aspartate aminotransferase, U/L                   | 20 (12.0), N=632      | 20.0 (12.0), N=294  | 20.0 (12.0), N=338   | 20 (10.0), N=197    | 19 (11.0), N=224               | 22 (14.0), N=81       | 20 (12.0), N=91                  | 29.5 (32.0), N=16 | 27 (58.0), N=23            |
| Albumin, g/L                                      | 37.5 (5.42), N=630    | 37.05 (5.7), N=294  | 37.9 (5.35)*, N=336  | 37.9 (5.0           |                                |                       |                                  |                   |                            |
